# Supplementary material
Source: PubMed Central journal article supplement (PMC3462476)
Supplement: supp_74.4.313_Figure_e_2.pdf [file supp_74.4.313_Figure_e_2.pdf]

# Controls > Patients

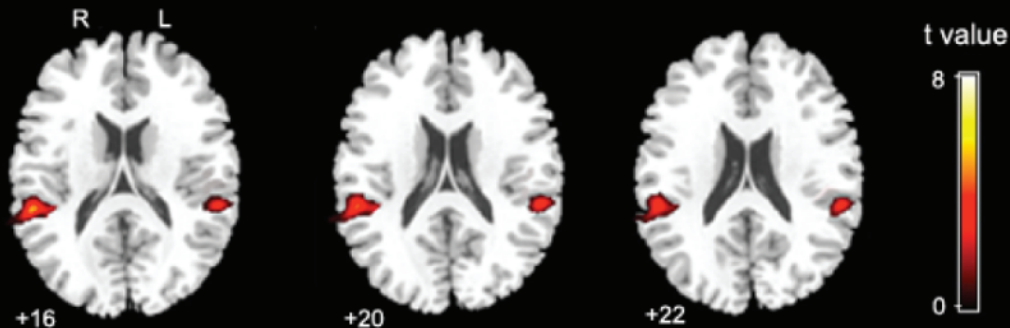

Figure e-2. **Brain regions that showed less increase in activity during stimulation in PVS than in controls** Interaction {(finger movement vs rest) x (patients vs controls)} (images are displayed at a non-corrected threshold  $p < 0.005$ ; SVC applied on BA40 areas, corrected  $p_{\text{FWE}} < 0.05$ ).
